# Supplementary material for: Crystal structure versus charge transport in organic single crystals of [1]benzothieno[3,2-b][1]benzothiophene derivatives from a multiscale theoretical study
Source: Royal Society of Chemistry journal article supplement (doi:10.1039/c3tc31711k), 2013-11-13
Supplement: c3tc31711k.pdf [file c3tc31711k.pdf]

**Electronic Supplementary Information:**

**Crystal structure versus charge transport in organic single crystals of  
[1]benzothieno[3,2-*b*][1]benzothiophene derivatives from a multiscale  
theoretical study**

Guangjun Nan <sup>\*a,b</sup>, Zesheng Li <sup>\*c,d</sup>

<sup>a</sup> State Key Laboratory of Urban Water Resource and Environment, Harbin Institute of Technology, 150090 Harbin, People's Republic of China. E-mail: gjan@hit.edu.cn

<sup>b</sup> Institute of Theoretical and Simulational Chemistry, Academy of Fundamental and Interdisciplinary Sciences, Harbin Institute of Technology, 150080 Harbin, People's Republic of China

<sup>c</sup> School of Chemistry, Beijing Institute of Technology, 100081 Beijing, People's Republic of China. E-mail: zeshengli@hit.edu.cn

<sup>d</sup> Key Laboratory of Cluster Science of Ministry of Education, Beijing Institute of Technology, 100081 Beijing, People's Republic of China

Table S1. The total intramolecular reorganization energies (in meV) for C<sub>n</sub>-BTBT (n=8, 10, 12) from the NM analysis approach and the AP approach, respectively.

|    | C <sub>8</sub> -BTBT | C <sub>10</sub> -BTBT | C <sub>12</sub> -BTBT |
|----|----------------------|-----------------------|-----------------------|
| NM | 248.3                | 245.7                 | 245.0                 |
| AP | 236.3                | 253.6                 | 241.8                 |

Table S2. The transfer integrals (in meV) for all the nearest-neighboring dimers of each system in Fig. 1 from the experimental crystal structures.

| Dimers | C <sub>8</sub> -BTBT | C <sub>10</sub> -BTBT | C <sub>12</sub> -BTBT |
|--------|----------------------|-----------------------|-----------------------|
| A1     | 38.37                | 45.02                 | 53.55                 |
| A2     | 38.37                | 45.02                 | 53.56                 |
| B1     | -7.26                | -21.58                | -36.91                |
| B2     | -7.25                | -21.59                | -36.92                |
| C1     | -7.25                | -21.57                | -36.91                |
| C2     | -7.26                | -21.55                | -36.91                |

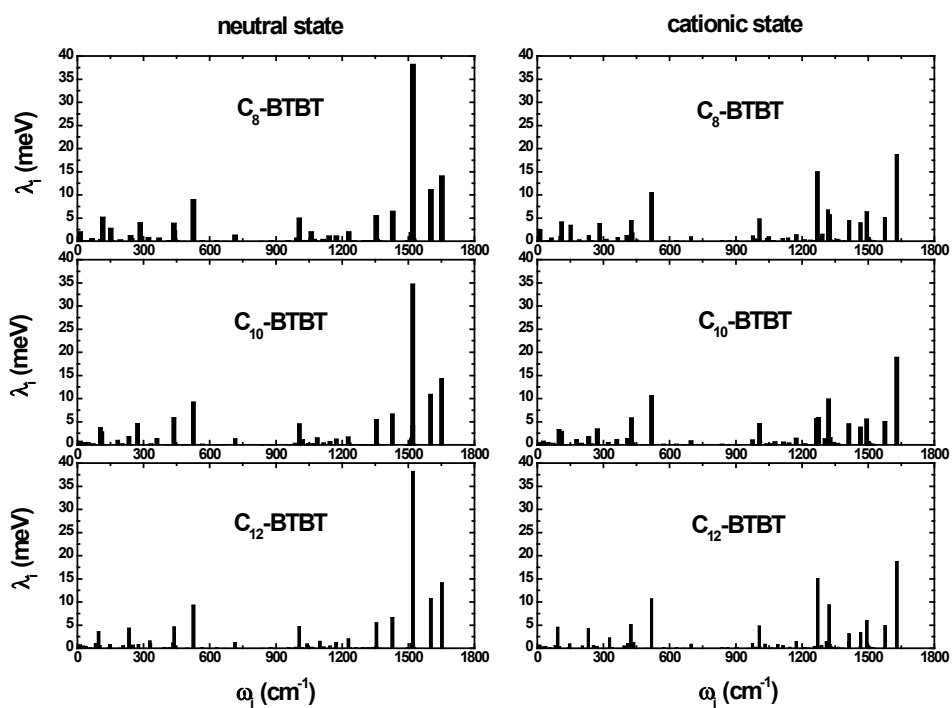

Figure S1. The vibrational frequency  $\omega_i$  and reorganization energy  $\lambda_i$  of each normal mode in  $C_n$ -BTBT ( $n=8, 10, 12$ ) for neutral and cationic states, respectively.

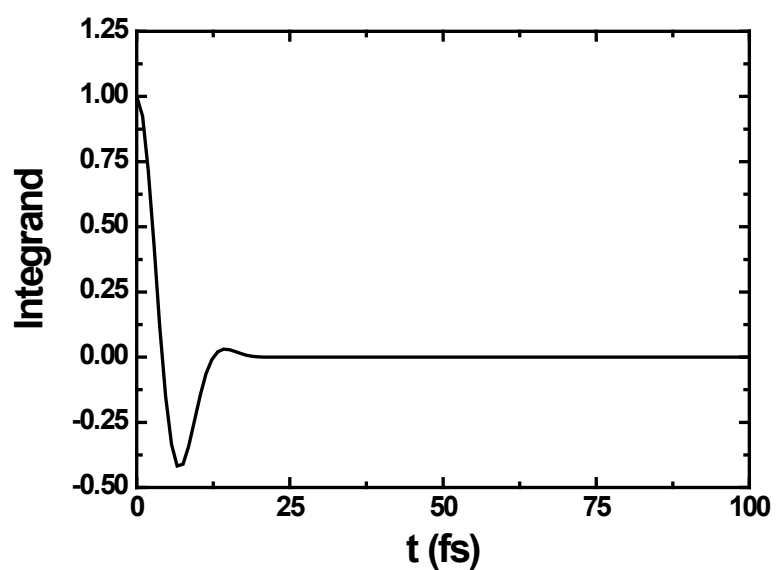

Figure S2. The relationship between integrand and time ( $t$ ) in Eq. (3) are shown for  $C_8$ -BTBT at 300 K. The case is much similar for  $C_{10}$ -BTBT and  $C_{12}$ -BTBT, respectively. Since the integrand in Eq. (3) is an even function, the relationship is only shown here for  $t \geq 0$ .

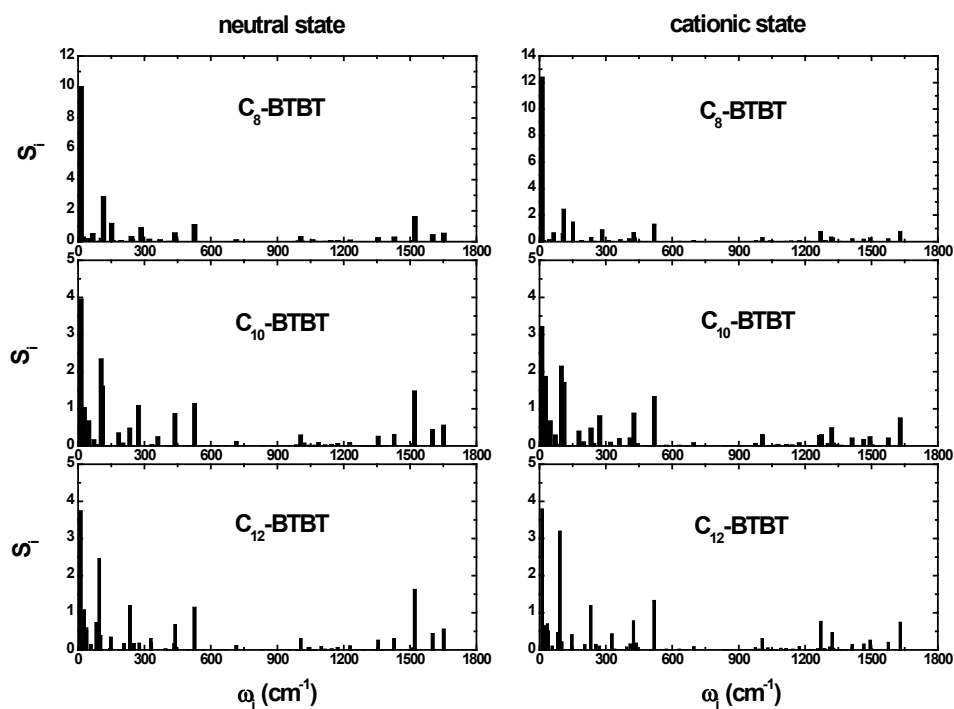

Figure S3. The Huang-Rhys factor  $S_i = \lambda_i / \hbar \omega_i$  of each normal mode in  $C_n$ -BTBT ( $n=8, 10, 12$ ) for neutral and cationic states, respectively.
